# Supplementary material for: AC 2007-2870: DESIGN OF AN EXPERIMENTAL POWER SOURCE USING HYDROGEN FUEL CELLS
Source: Royal Society of Chemistry journal article supplement (doi:10.1039/c7dt00881c), 2007-01-01
Supplement: c7dt00881c1.pdf [file c7dt00881c1.pdf]

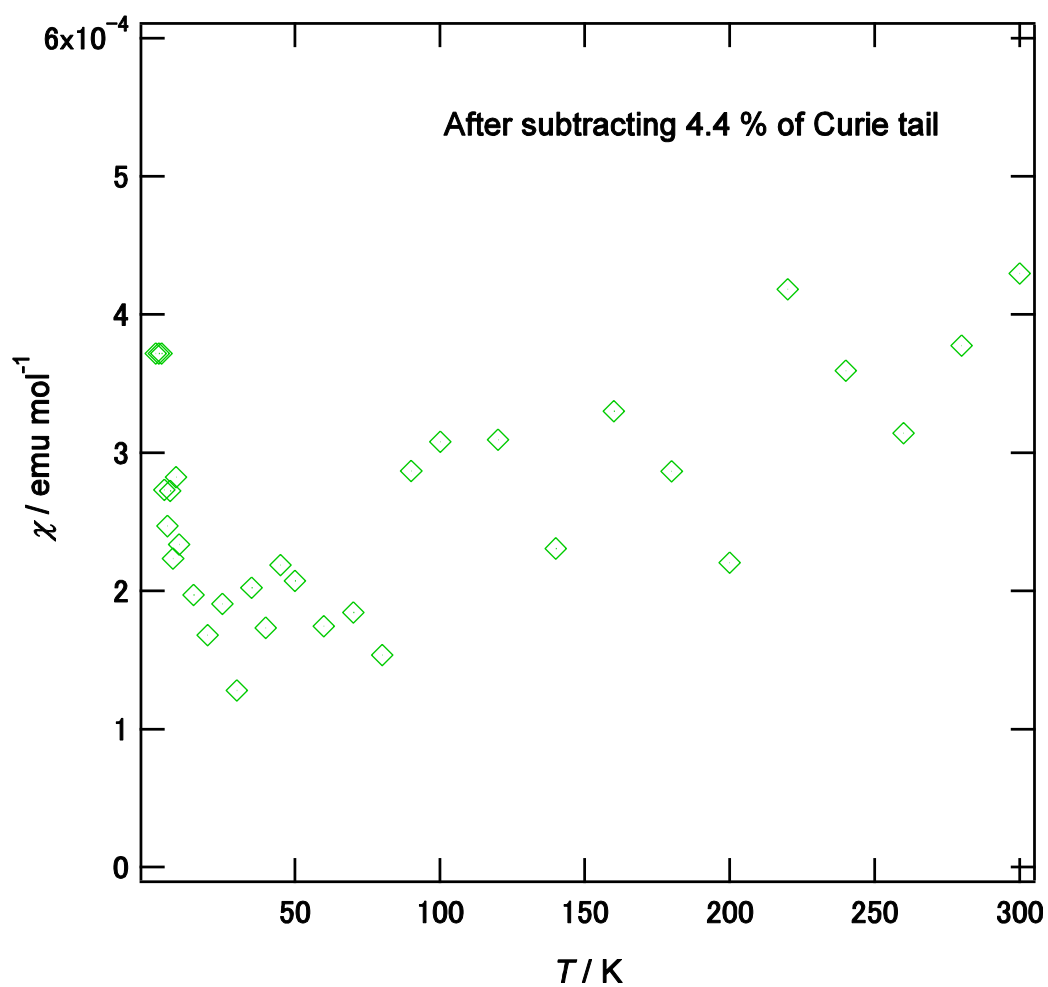

Preliminary magnetic susceptibility data of **1** of 1.5046 mg

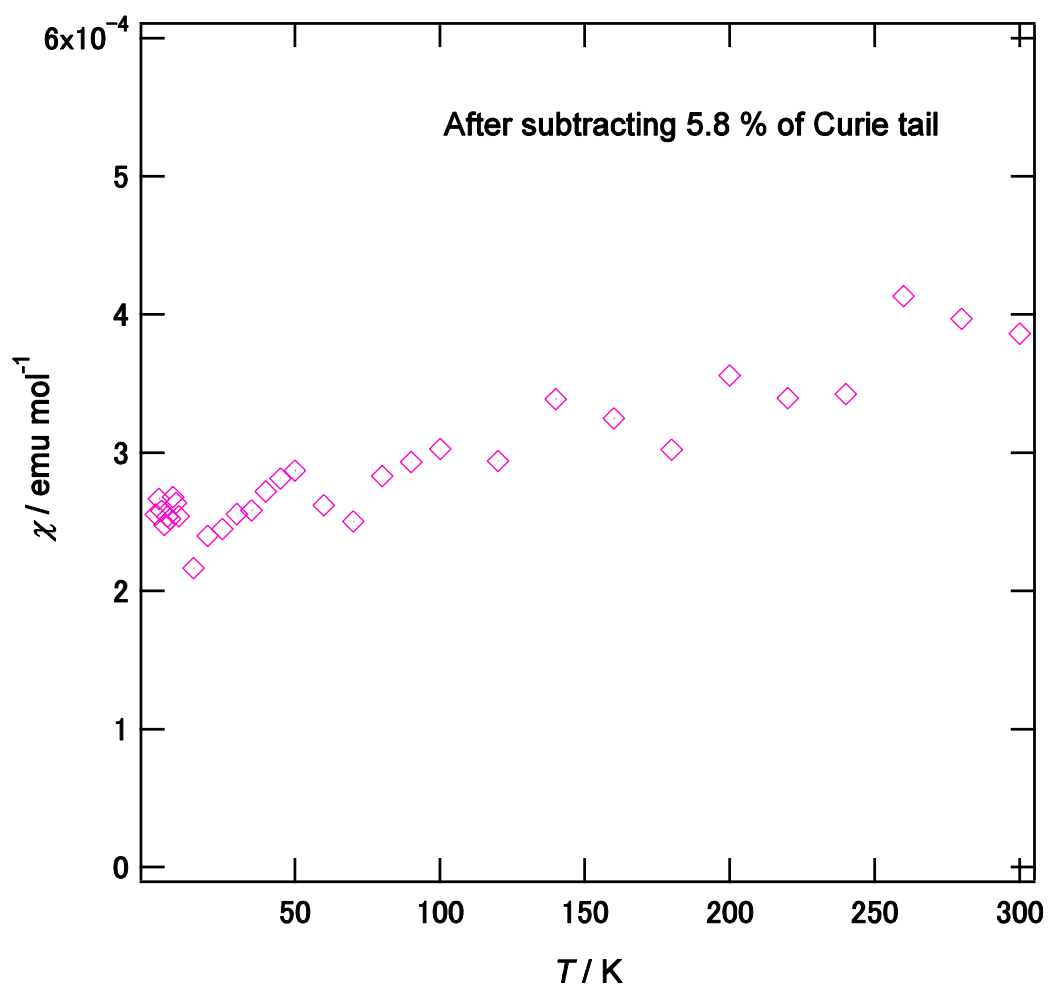

Magnetic susceptibility data of **2** of 3.7138 mg

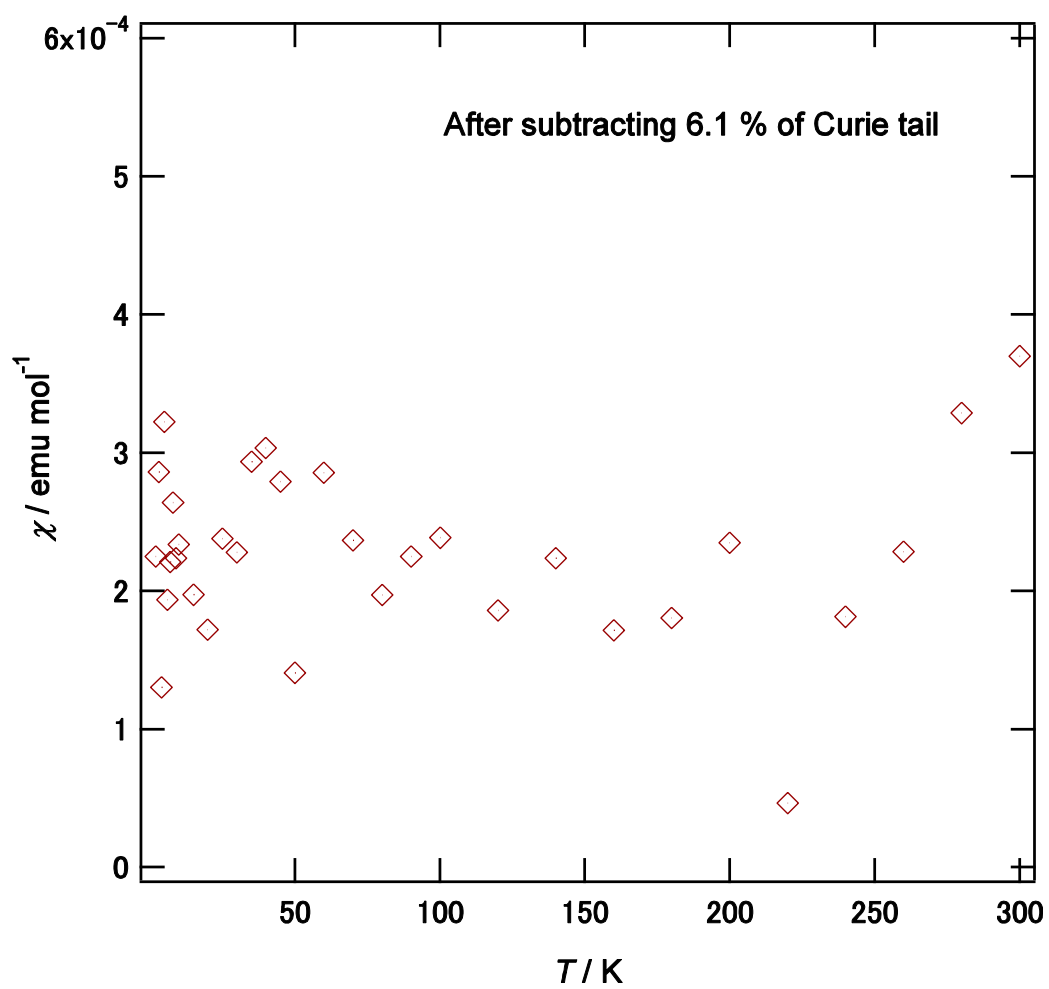

Preliminary magnetic susceptibility data of **3** of 1.1743 mg
